# Supplementary figures and images for: FecB, a periplasmic ferric-citrate transporter from E. coli, can bind different forms of ferric-citrate as well as a wide variety of metal-free and metal-loaded tricarboxylic acids
Source: Royal Society of Chemistry journal article supplement (doi:10.1039/c5mt00218d), 2015-11-13

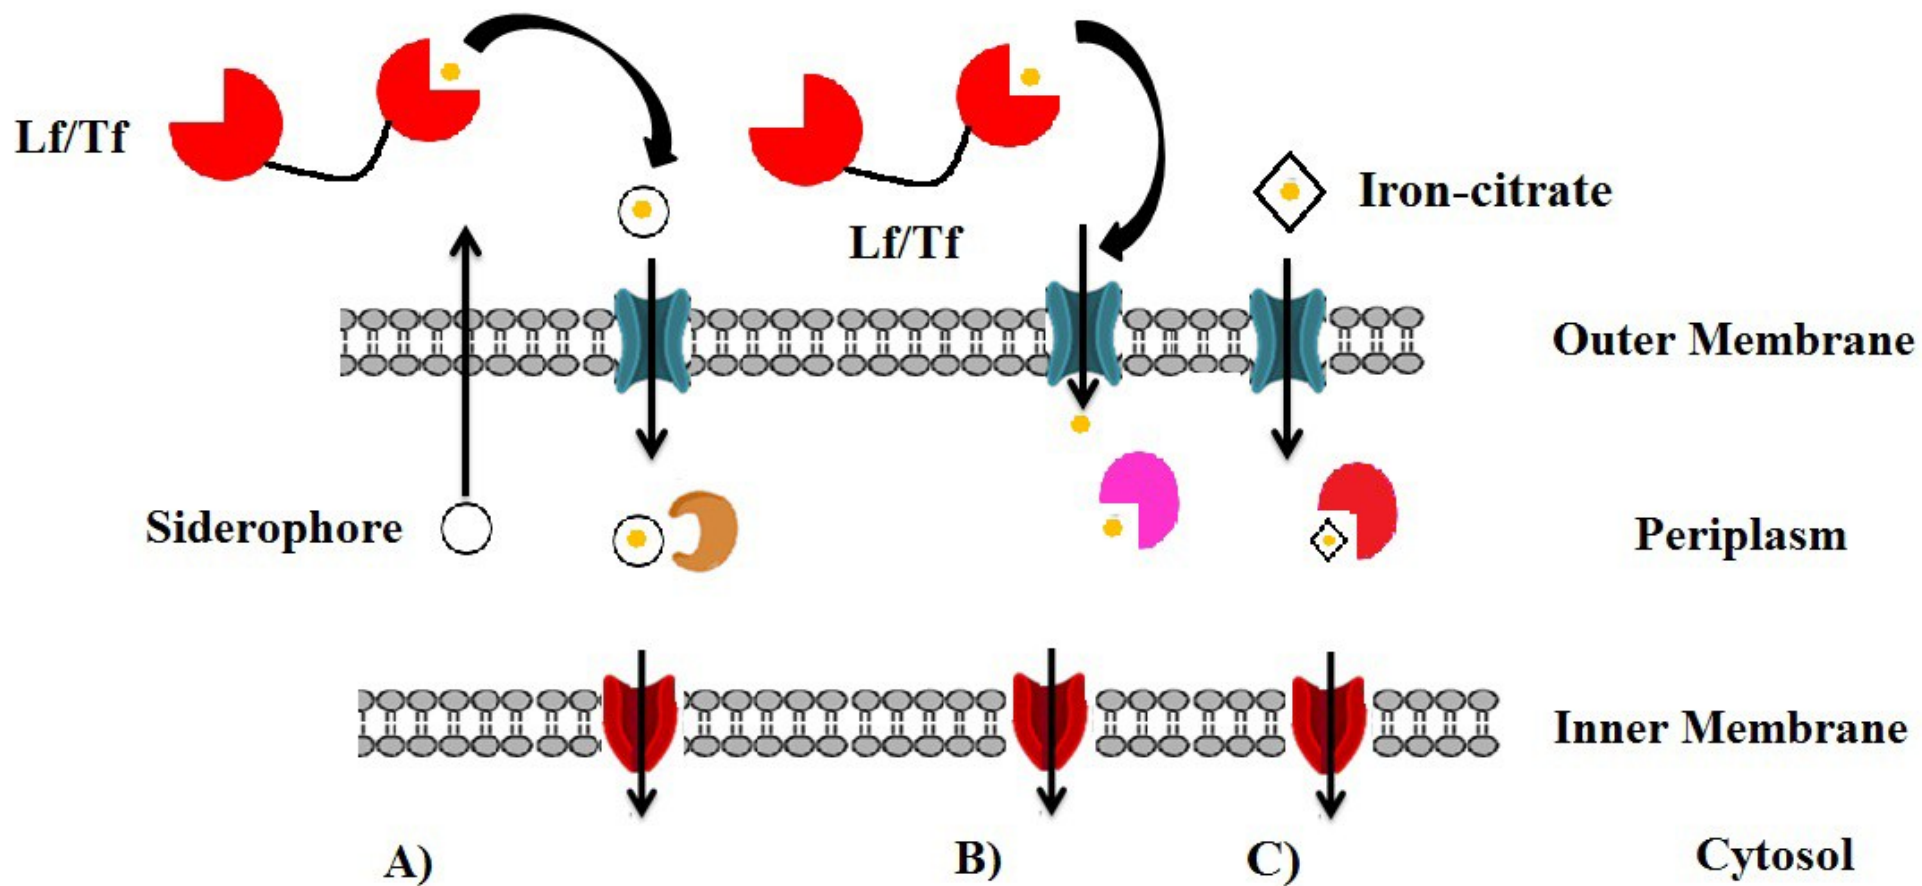

Supplement: c5mt00218d2.pdf [file c5mt00218d2.pdf]

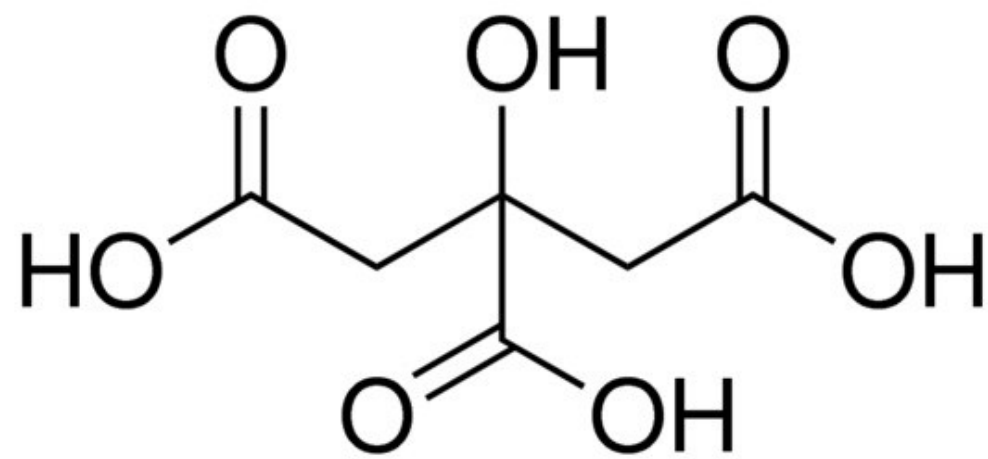

a)

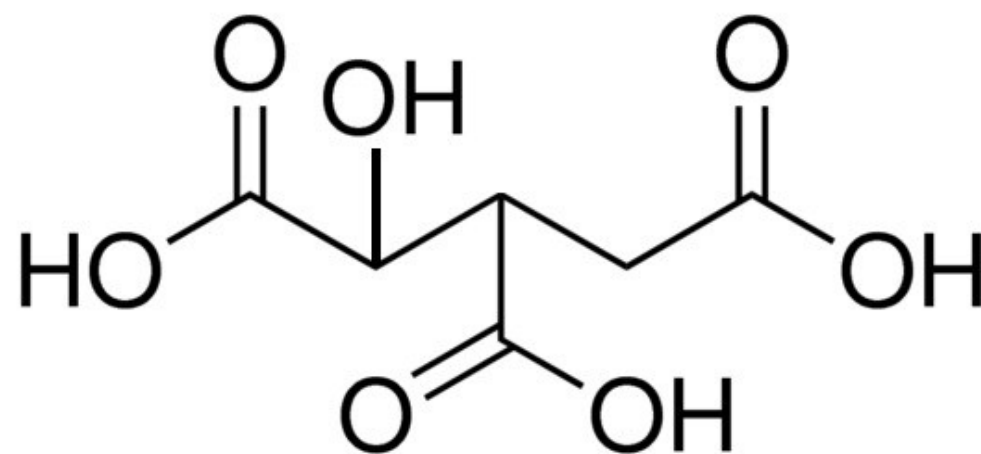

b)

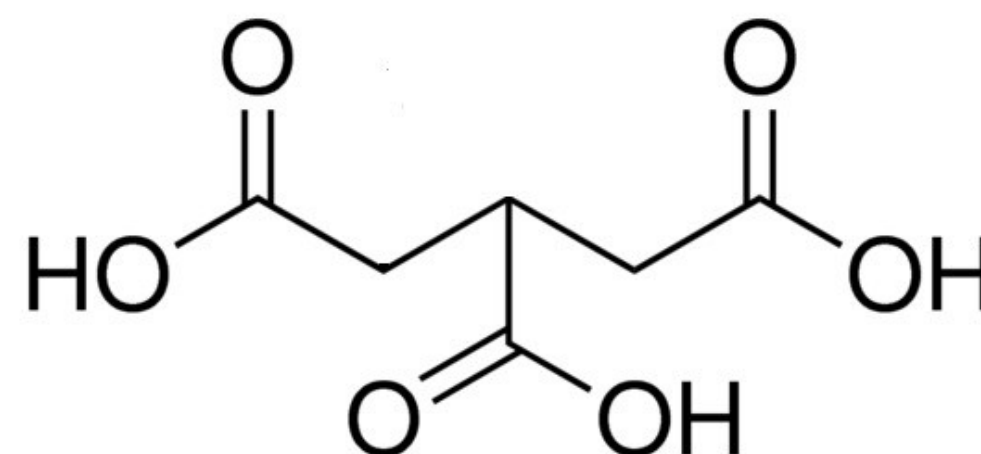

c)

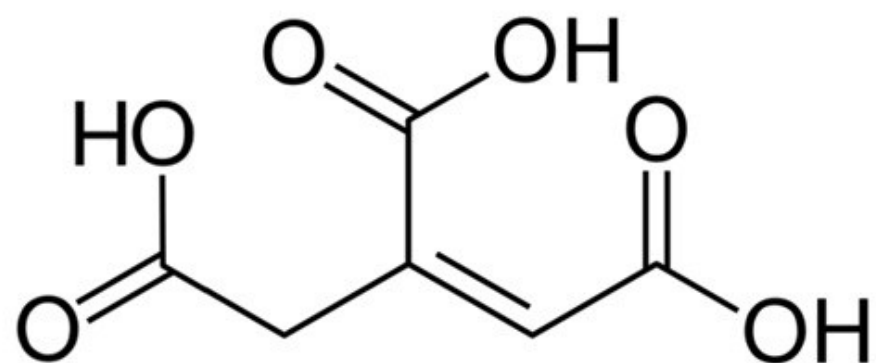

d)

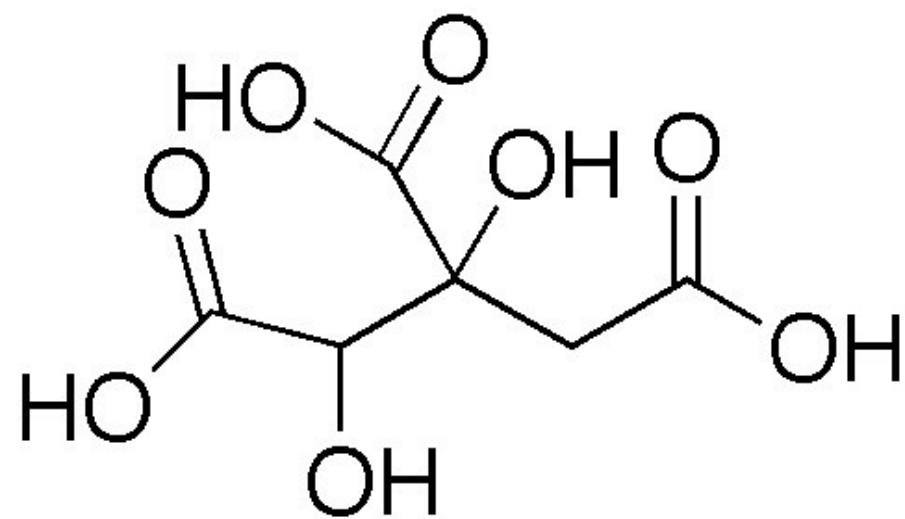

e)

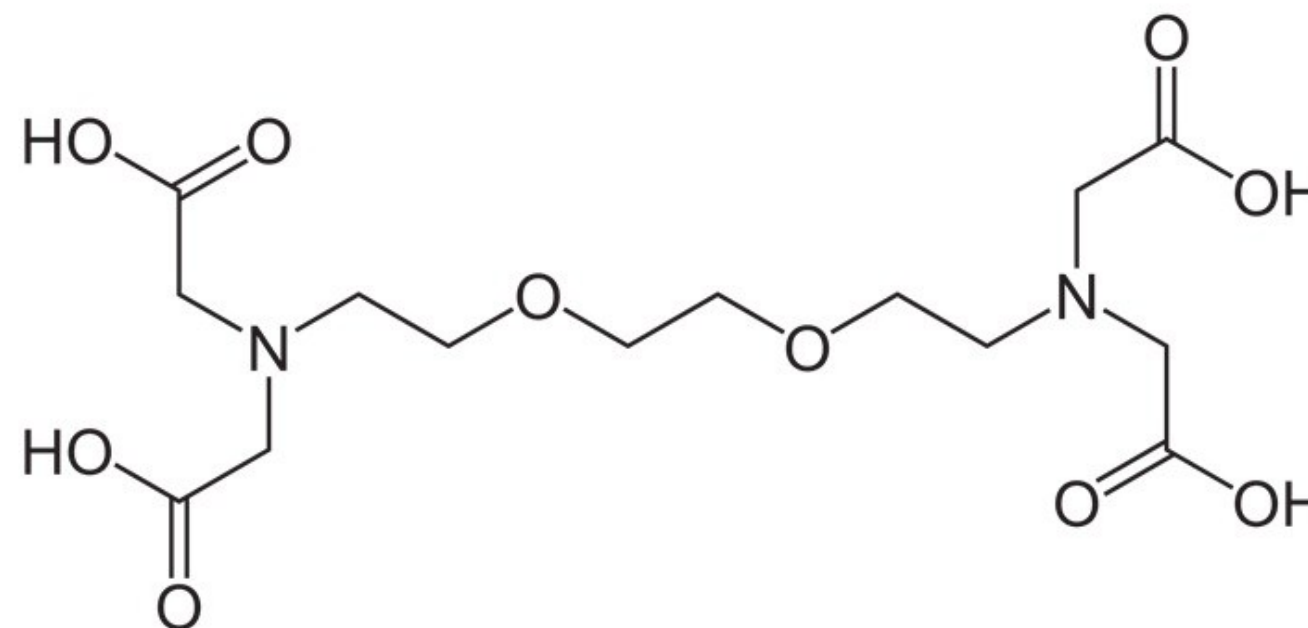

f)

Supplement: c5mt00218d3.pdf [file c5mt00218d3.pdf]

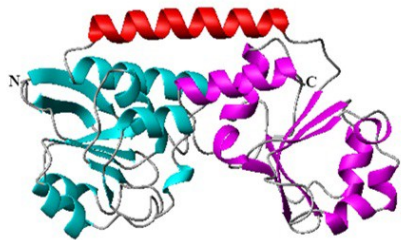

a)

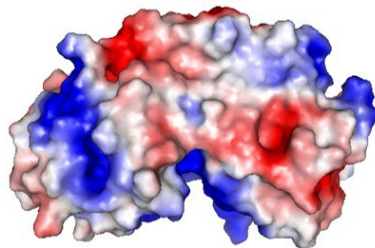

b)

Supplement: c5mt00218d4.pdf [file c5mt00218d4.pdf]

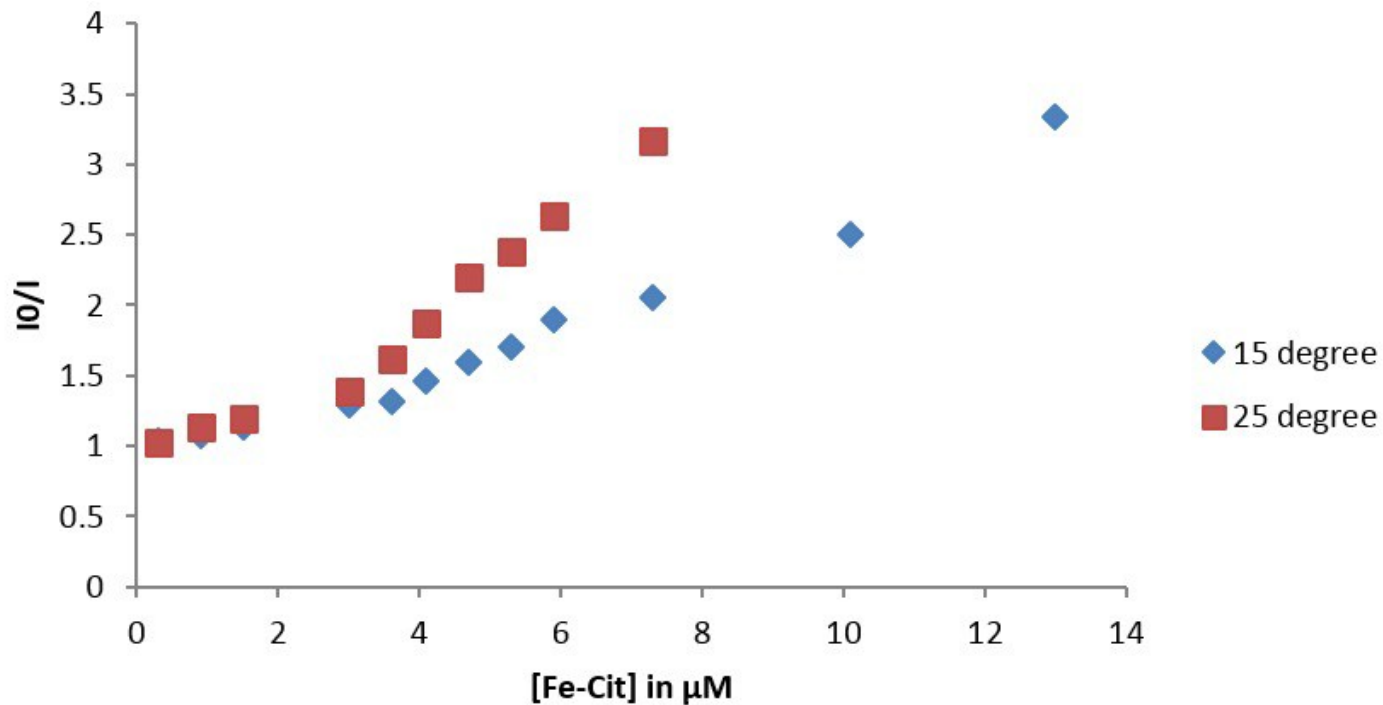

Supplement: c5mt00218d5.pdf [file c5mt00218d5.pdf]

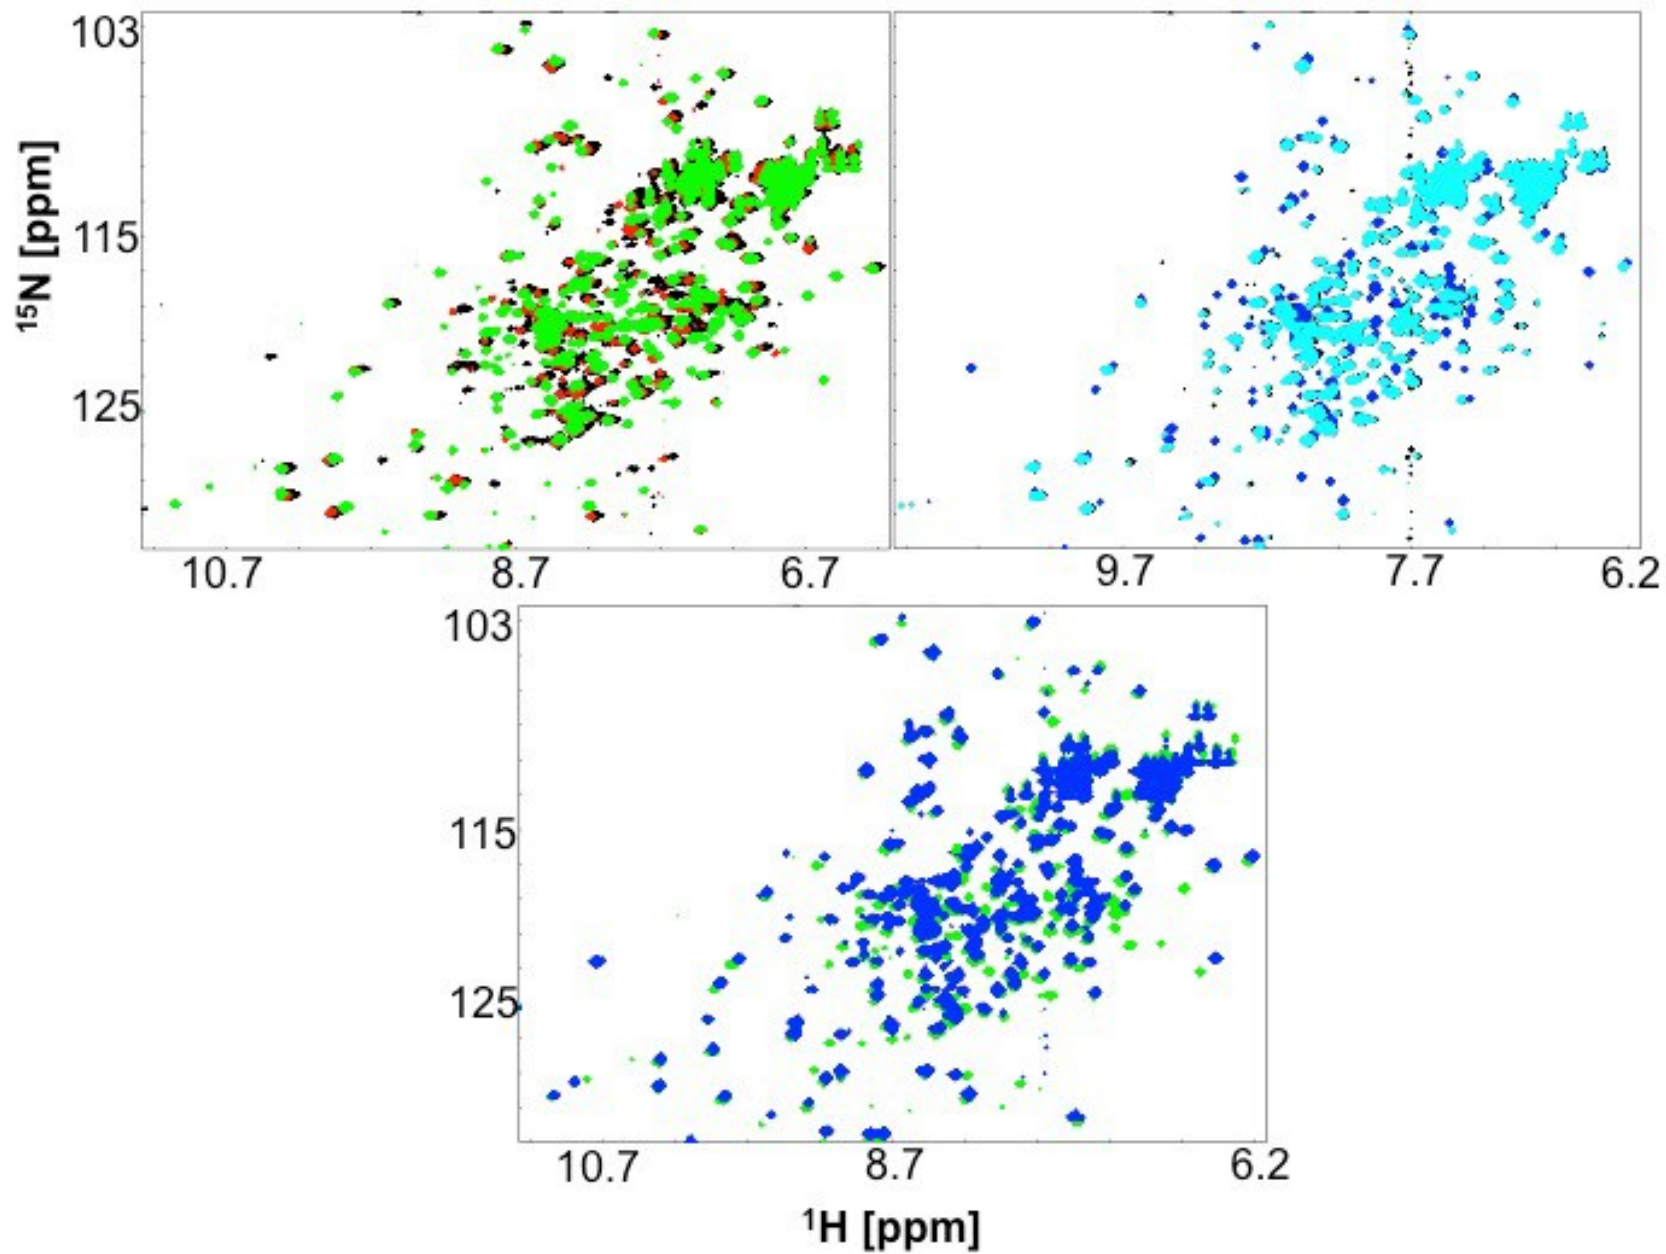

Supplement: c5mt00218d6.pdf [file c5mt00218d6.pdf]
